# Supplementary material
Source: PubMed Central journal article supplement (PMC3730915)
Supplement: a8f72ff42acdeb6de082da7f301dce03_genetics.113.152322-4.pdf [file a8f72ff42acdeb6de082da7f301dce03_genetics.113.152322-4.pdf]

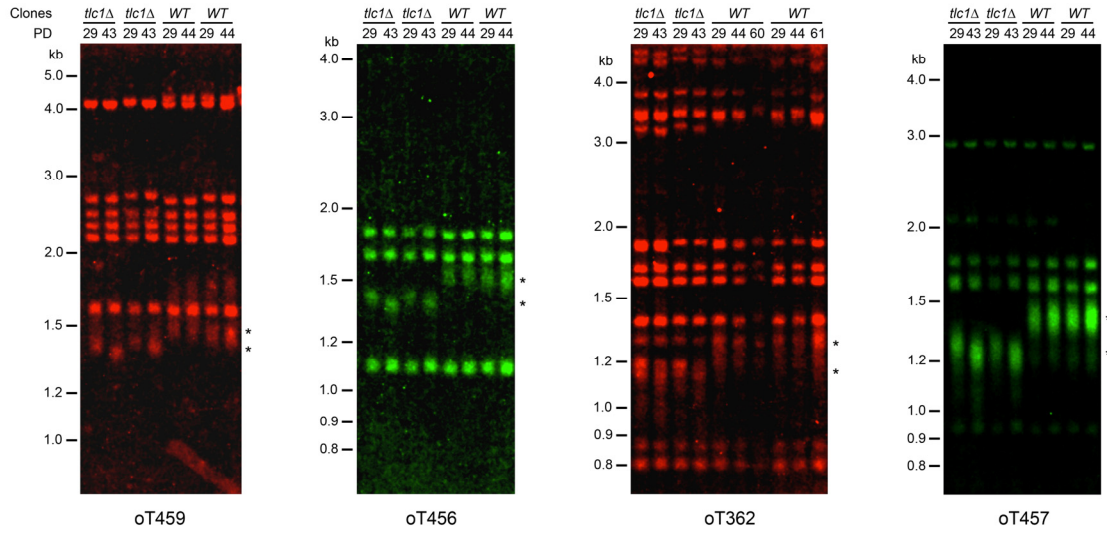

**Figure S2 Other examples of single-telomere Southern blots using oT459, oT456, oT362 and oT457 fluorescent probes.** Telomerase-positive (wild-type, WT) or negative (*tlc1Δ*) cells from the same tetrad were harvested at different population doublings (PD). Genomic DNAs were extracted, digested with the adequate enzyme (NdeI/BstEII or BstNI) and Southern blots were performed using the indicated probe. Different non specific bands could be observed for each probe. The positions of the telomere signals are marked with the asterisks.
