# Supplementary material
Source: PubMed Central journal article supplement (PMC3730915)
Supplement: c9326484496d70ee2721474adeca0c78_genetics.113.152322-5.pdf [file c9326484496d70ee2721474adeca0c78_genetics.113.152322-5.pdf]

**Table S1 Oligonucleotides probes used in single-telomere Southern blot.**

| Probe name | Telomere | Subtelomere elements | Restriction enzyme | Probe sequence                                  | Size of terminal restriction fragment in bp | Quality <sup>1</sup> |
|------------|----------|----------------------|--------------------|-------------------------------------------------|---------------------------------------------|----------------------|
| oT355      | I-L      | X                    | NdeI               | GCTTGTGGTAGCAACACTATCATGGTAT<br>CAC             | 965                                         | +++                  |
| oT356      | II-R     | X                    | BstEII             | CTAACACAATCCTAACAGTACCCTATTCT<br>AACCCGTATG     | 1308                                        | ++                   |
| oT357      | III-L    | X                    | BstEII             | CTCAATTTATACACACTTATGTCAATATAA<br>CCACAAAATCAC  | 828                                         | +                    |
| oT358      | XI-L     | X                    | BstEII             | TTTTACCTGTCTCCAAACCTACCCTCAC<br>ATTACCCTA       | 964                                         | +                    |
| oT360      | VI-R     | X                    | NdeI               | CATTCCGAACGCTATTCCAGAAAGTAGT<br>CCAGCC          | 688                                         | +++                  |
| oT361      | VII-L    | X                    | BstEII             | CTATTTTCTTGAACGGATGACATTTTCATG<br>TTG           | 840                                         | ++                   |
| oT362      | XIV-R    | X                    | NdeI               | TTCTACAACCTCCAACCACCATCCATCTC<br>TCTACTTACCACTA | 988                                         | +                    |
| oT455      | X-R      | X                    | NdeI               | CATGCCATACTCACTTGCACTTGTATACT<br>GATATGG        | 391                                         | +                    |
| oT456      | I-R      | X                    | BstNI              | CAAGATGGTAAAAGATTGAAGGCGTATC<br>GTGGTATGG       | 1171                                        | +++                  |
| oT457      | IX-L/X-L | XY'/XY'              | BstNI              | GTTGTTGTGGAAGCGCTCGAGAAAGG                      | 1165                                        | +++                  |
| oT459      | XV-L     | X                    | BstNI              | GTGGTATTGATACGTAATTGAGTG                        | 1149                                        | +++                  |

<sup>1</sup>Refers to the sensitivity and the specificity of the oligonucleotide probe:

+++ sensitive and specific telomeric signal; ++ less sensitive but specific telomeric signal; + presence of non specific bands that may hinder analysis
